# Supplementary material
Source: Springer Nature journal article supplement (https://www.springermedizin.de/resource/supplementary/12889_2014_6715_MOESM3_ESM.pdf/9498922)

**Other factors**  
Economic, political, and cultural factors

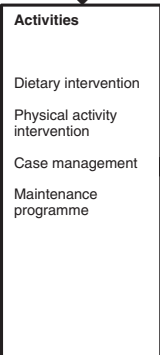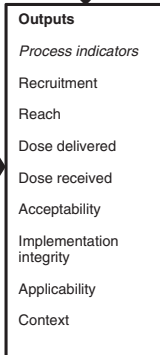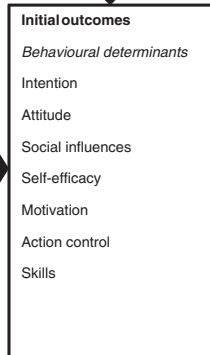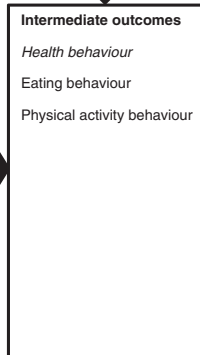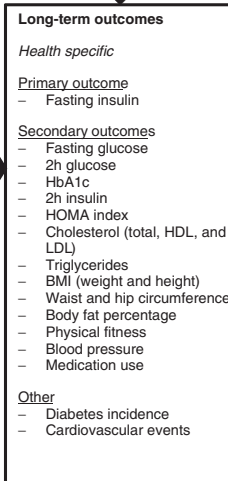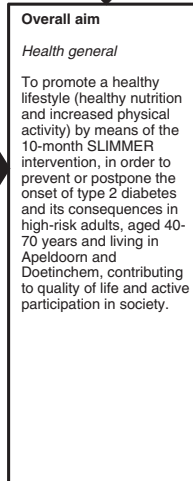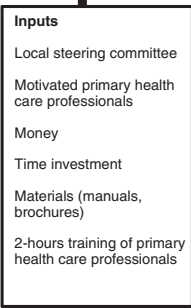

Supplement: MOESM3 [file 9498922]
